# Supplementary material for: Thiamine diphosphate reduction strongly correlates with brain glucose hypometabolism in Alzheimer’s disease, whereas amyloid deposition does not
Source: PubMed Central journal article supplement (PMC5831864; doi:10.1186/s13195-018-0354-2), 2018-03-01
Supplement: 13195_2018_354_MOESM1_ESM.pdf [file 13195_2018_354_MOESM1_ESM.pdf]

**Thiamine diphosphate reduction strongly correlates with brain glucose hypometabolism in Alzheimer's disease, while amyloid deposition does not**

Shaoming Sang<sup>1#</sup>, Xiaoli Pan<sup>1#</sup>, Zhichun Chen<sup>1</sup>, Fan Zeng<sup>5</sup>, Shumei Pan<sup>1</sup>, Huimin Liu<sup>1</sup>, Lirong Jin<sup>1</sup>, Guoqiang Fei<sup>1</sup>, Changpeng Wang<sup>1</sup>, Shuhua Ren<sup>3</sup>, Fangyang Jiao<sup>3</sup>, Weiqi Bao<sup>3</sup>, Weiyan Zhou<sup>3</sup>, Yihui Guan<sup>3</sup>, Yiqiu Zhang<sup>4</sup>, Hongcheng Shi<sup>4</sup>, Yanjiang Wang<sup>5</sup>, Xiang Yu<sup>2</sup>, Yun Wang<sup>1\*</sup>, Chunjiu Zhong<sup>1\*</sup>

**Supplementary Figures**

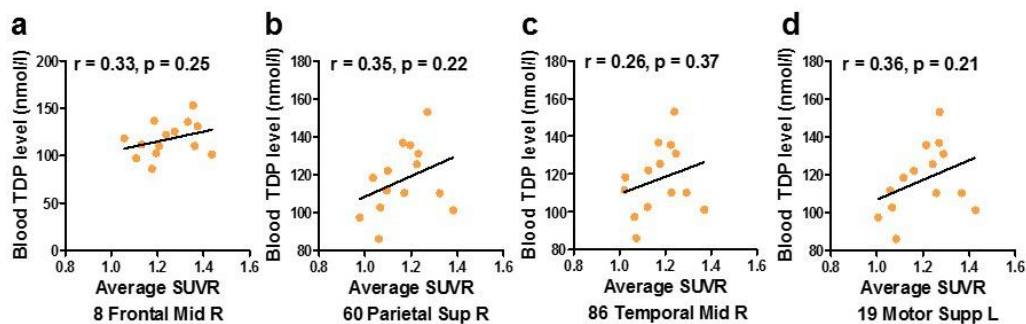

**Figure S1. Blood TDP levels do not significantly correlate with brain glucose metabolism in control subjects. a-d.** Correlation between SUVRs of representative brain regions and blood TDP levels in control subjects (N = 14).

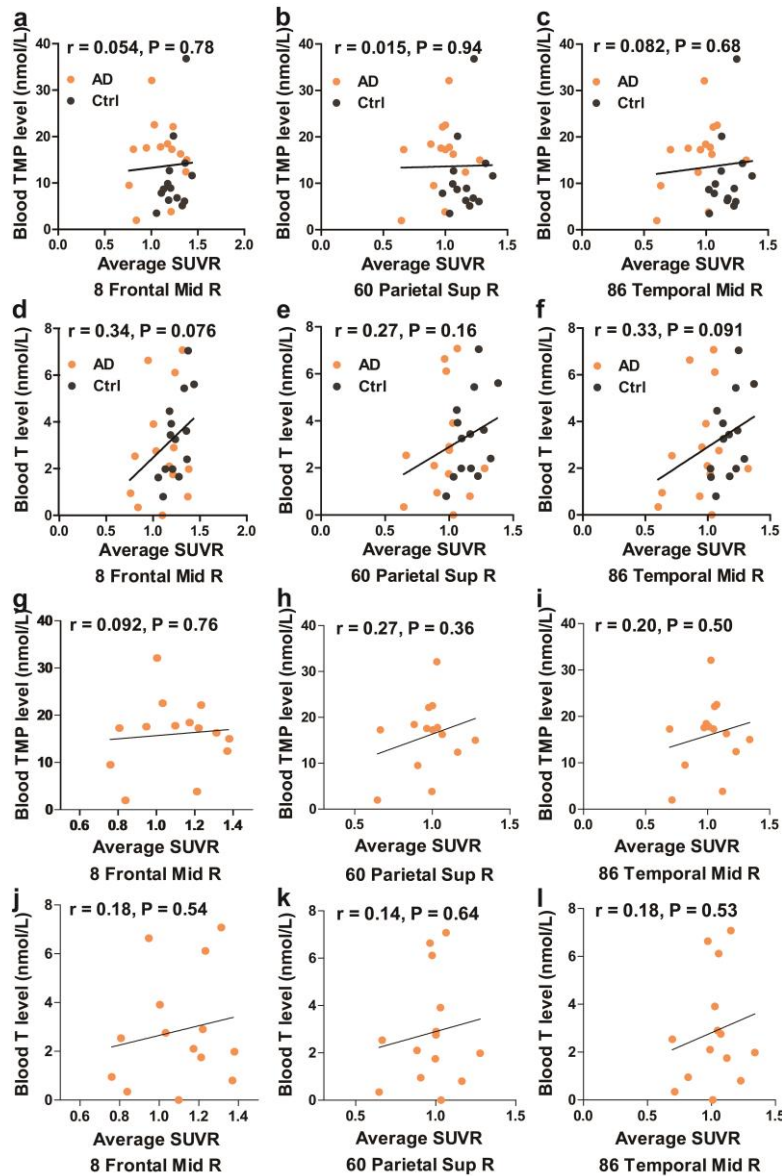

**Figure S2. Blood TMP and thiamine levels do not significantly correlate with brain glucose metabolism. a-c.** Correlation between SUVRs of representative brain regions and blood TMP levels in all subjects (N = 28). **d-f.** Correlation between SUVRs of representative brain regions and blood thiamine levels in all subjects (N = 28). **g-i.** Correlation between SUVRs of representative brain regions and blood TMP levels in AD patients (N = 14). **j-l.** Correlation between SUVRs of representative brain regions and blood thiamine levels in AD patients (N = 14).

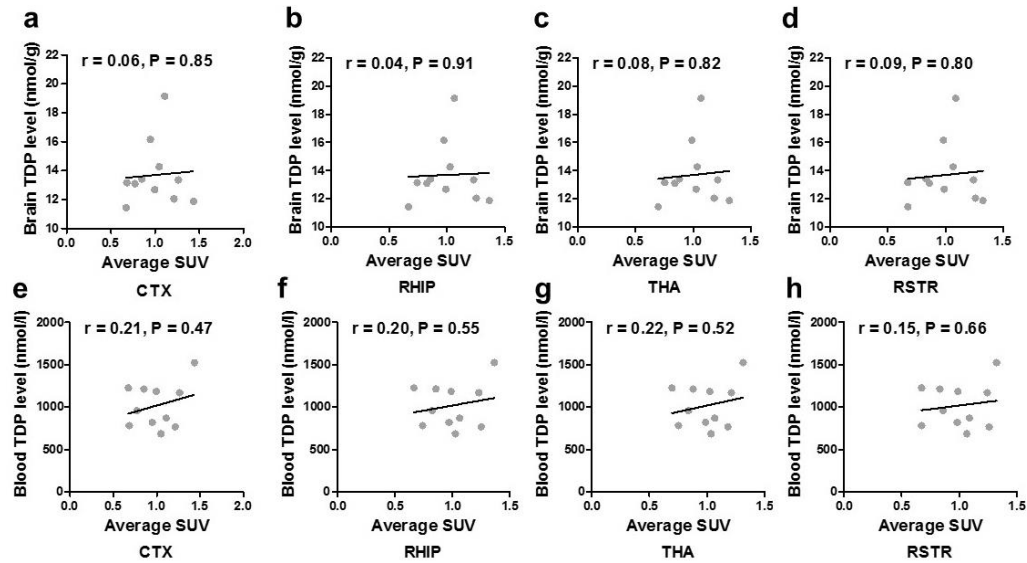

**Figure S3. Blood and brain TDP levels do not significantly correlate with brain glucose metabolism in control mice.** a-d. Correlations between brain TDP levels and SUVs in representative brain regions of control mice (N = 11). e-h. Correlations between blood TDP levels and SUVs in representative brain regions of control mice (N = 11).

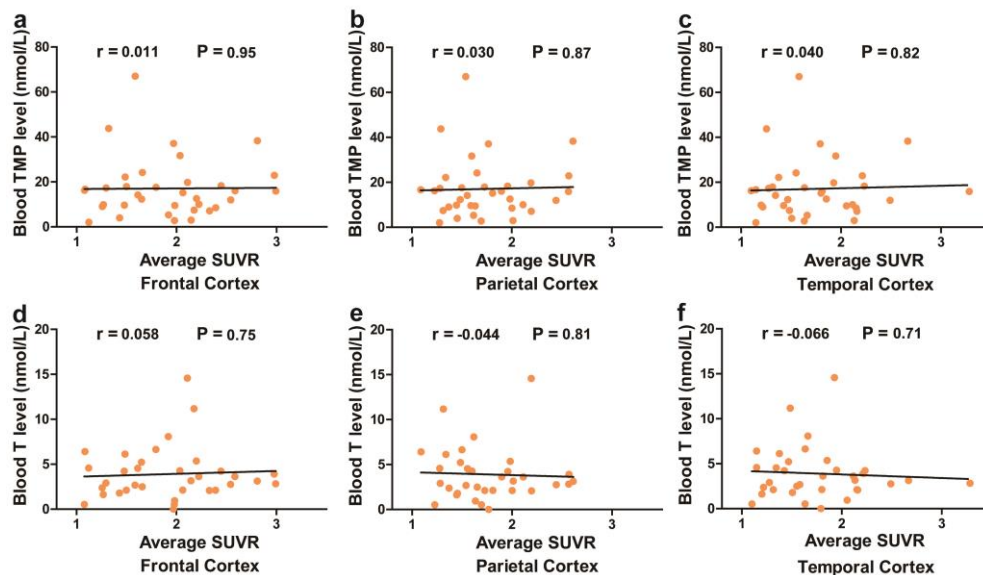

**Figure S4. Blood TMP and thiamine levels do not significantly correlate with brain amyloid deposits in AD patients.** a-c. Blood TMP levels did not significantly correlate with average SUVRs of representative brain regions in AD patients (N = 35). d-f. Blood thiamine levels did not significantly correlate with average SUVRs of representative brain regions in AD patients (N = 35).
